# Supplementary material
Source: PubMed Central journal article supplement (PMC4118667)

Figure S1

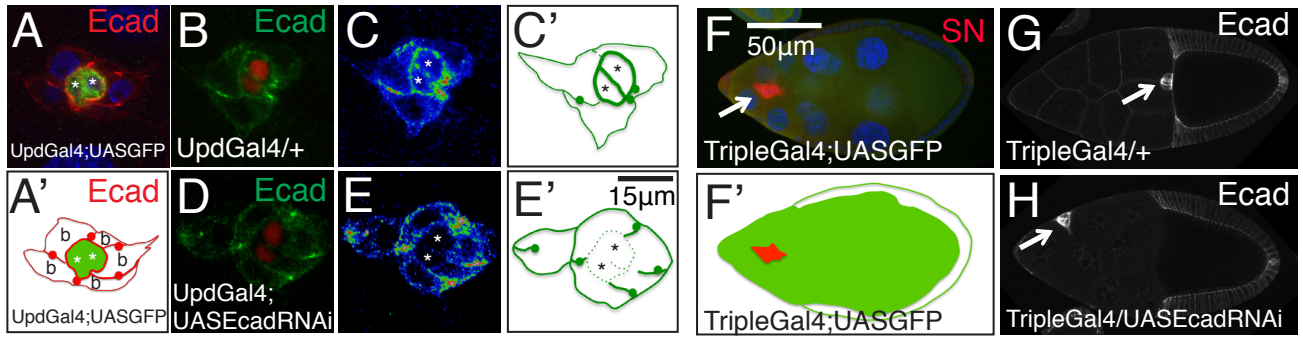

Figure S2

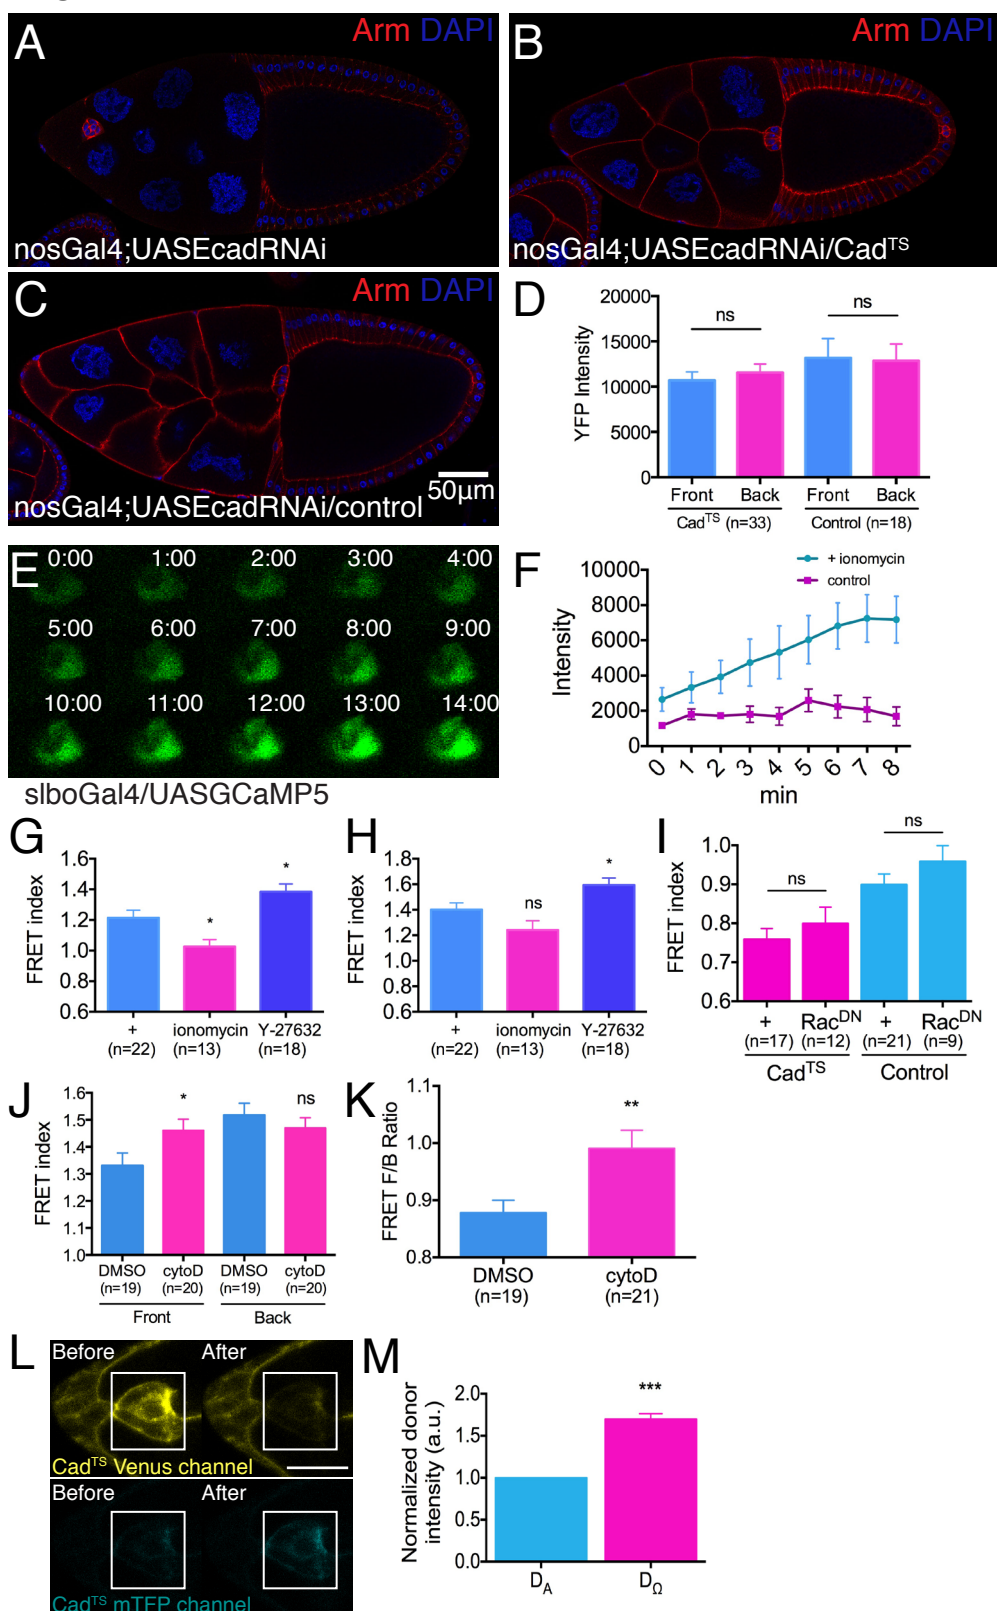

Figure S3

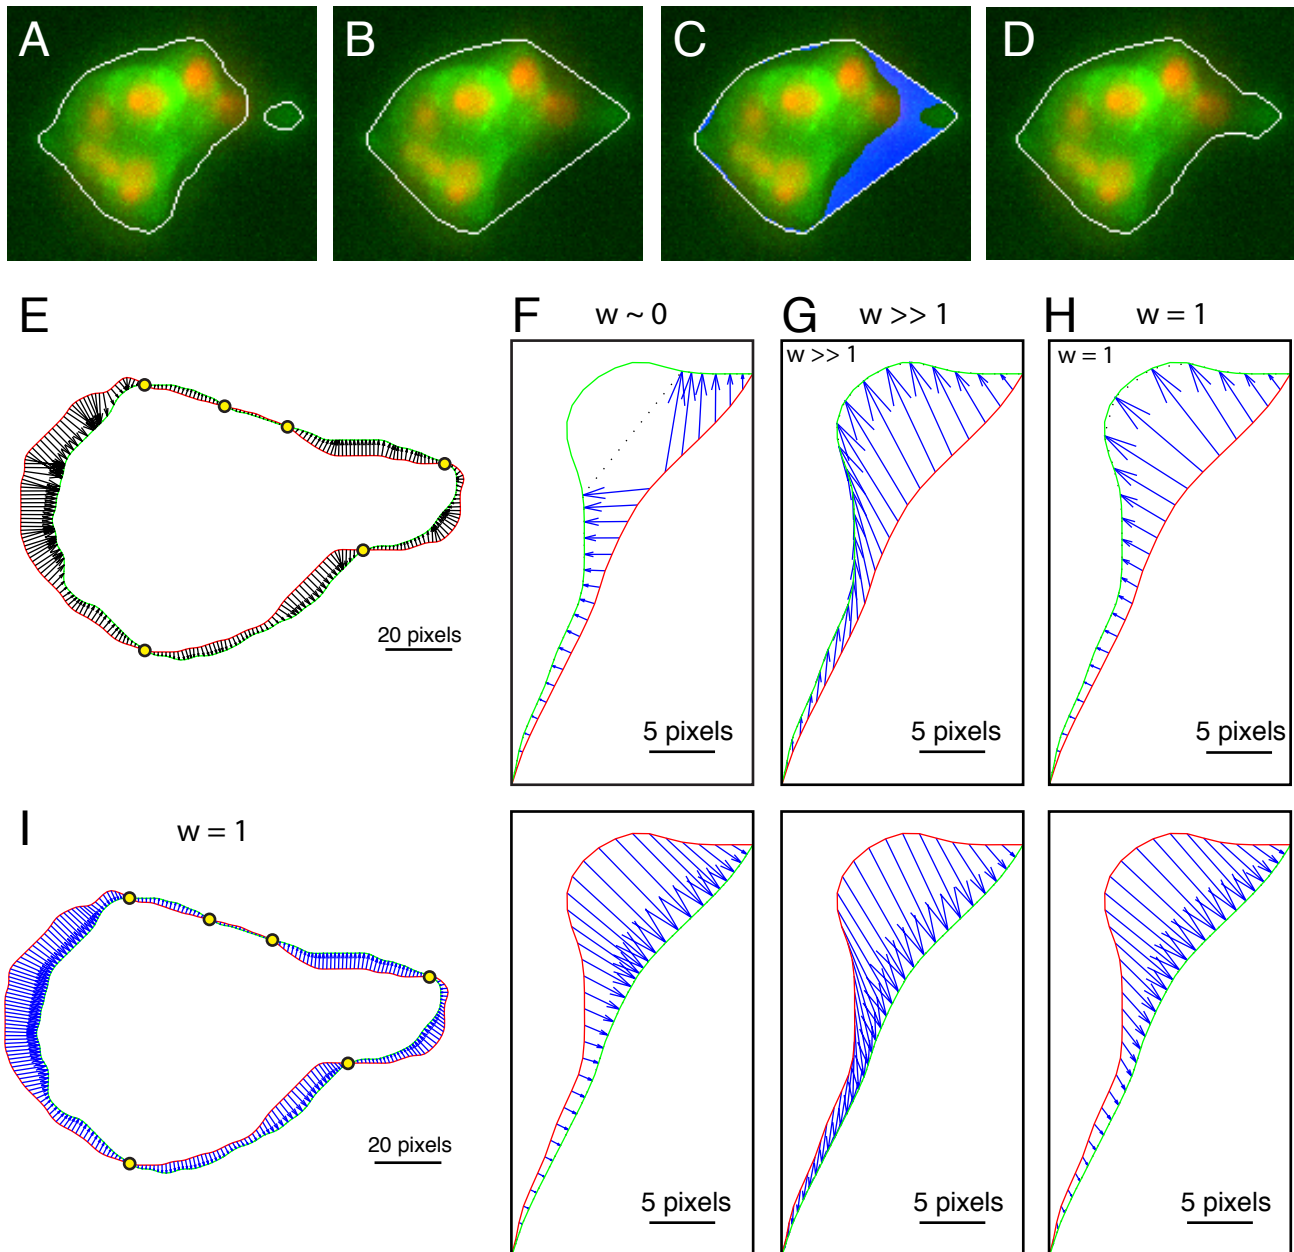

## Figure S4

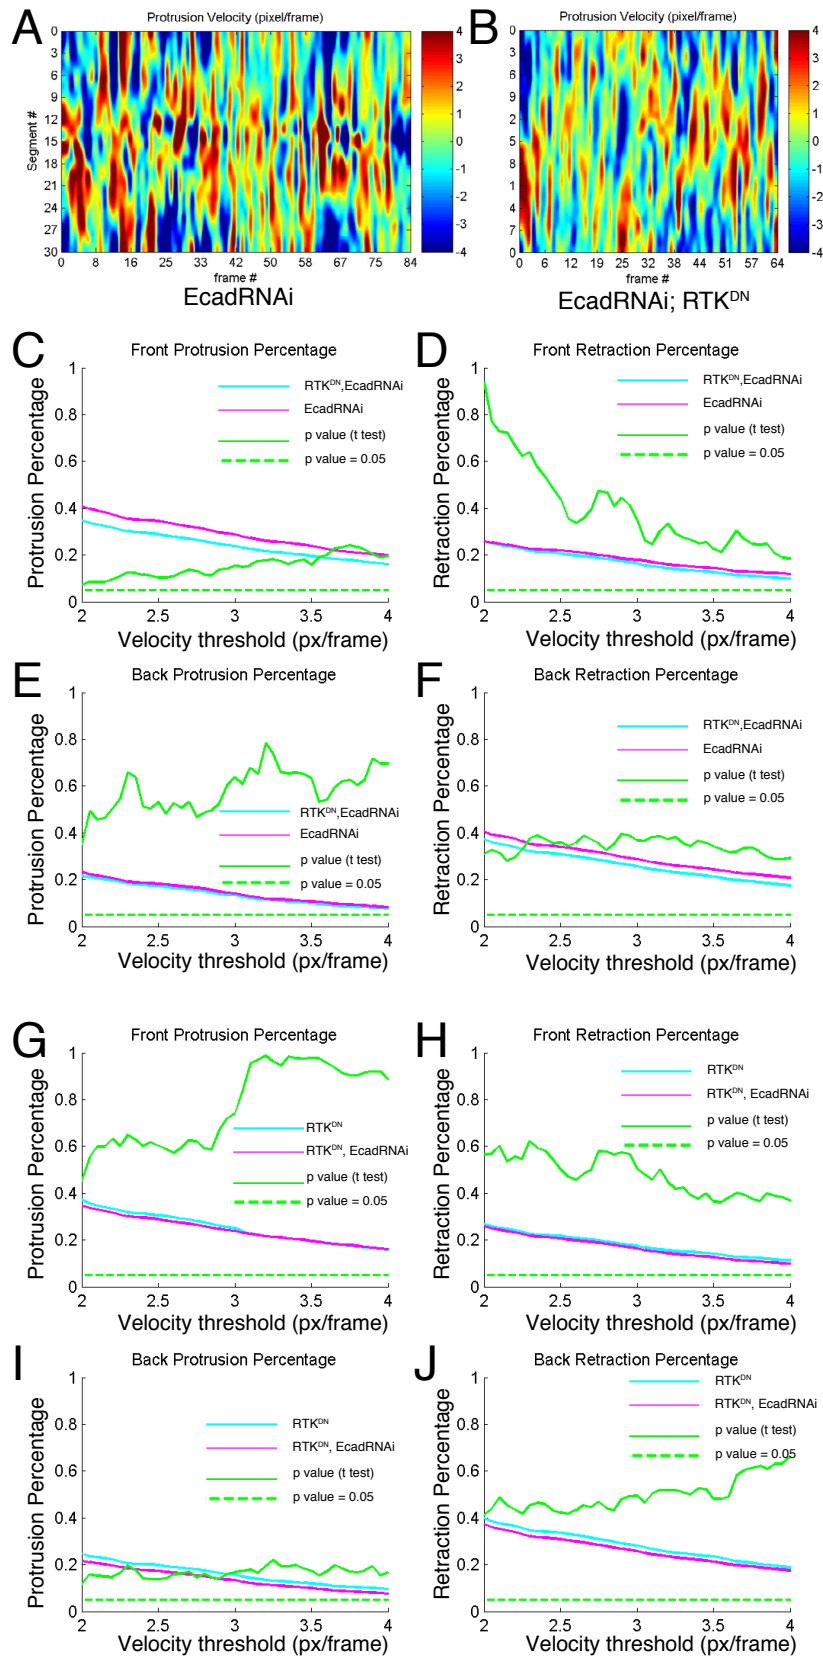

Supplement: NIHMS599082-supplement-02.pdf [file NIHMS599082-supplement-02.pdf]
